# Supplementary material for: Hirudins and fenestrins of the African medicinal leech Asiaticobdella fenestrata
Source: Research Square preprint supplement (doi:10.21203/rs.3.rs-7758907/v1), 2025-10-16
Supplement: Supplementary file 1 [file 9dad4d8f14196b68a0d252e0.docx]

**Table S1** List of oligonucleotide primers used in the study

Afen_HV1_fw: 5`-GTGAGATTCACTGAATGTGATAAG-3` Afen_HV1_rev: 5`-TTAAGCTTATTTCTTTTCAATATCTTCC-3`

Afen_HV2_fw: 5`-ATGAGATACACTGCTTGTACAGAG-3` Afen_HV2_rev: 5`-TTAAGCTTCATTTATCGAACTCTAAAGG-3`

Afen_HLF1_fw: 5`-AGGGGAGATTTCCCAGATTGTGTAG-3` Afen_HLF1_rev: 5`-TTAAGCTTCATTTTTCATTAATTGGAAATTC-3`

Afen_HLF2_fw1: 5`-TATTATGGAAATAGAGGAGATGG-3` Afen_HLF2_fw2: 5`-AGAGGAGATGGTCTCCCACATTGTAC-3` Afen_HLF2_rev: 5`-TTAAGCTTCATTTGCCAGAAACACATTC-3`
